# Supplementary material
Source: Royal Society of Chemistry journal article supplement (doi:10.1039/d6nr00521g)
Supplement: d6nr00521g1.pdf [file d6nr00521g1.pdf]

## Supplementary Information

In situ Growth of Sn Nanowires on Al Matrix using  $\text{Ti}_2\text{SnC}$  as Sn Source

Xinxin Xia<sup>1</sup>, Peigen Zhang<sup>1,\*</sup>, Fugang Nie<sup>2</sup>, Jian Liang<sup>2</sup>, Cheng Zhang<sup>1</sup>, Inamullah Maitlo<sup>3</sup>, Hengjia Lou<sup>1</sup>, Chengzong Shen<sup>1</sup>, Jianxiang Ding<sup>1,\*</sup>, Balázs Illés<sup>4</sup>, Wei Zheng<sup>1,\*</sup>, ZhengMing Sun<sup>1,\*</sup>

<sup>1</sup> School of Materials Science and Engineering, Southeast University, Nanjing 211189, P.R. China

<sup>2</sup> ZTE Manufacturing Engineering Research Institute, ZTE Industrial Park, Shenzhen, 518000, P.R. China

<sup>3</sup> Department of Metallurgy and Materials Engineering, Dawood University of Engineering and Technology, Karachi.

<sup>4</sup> Department of Electronics Technology, Faculty of Electrical Engineering and Informatics, Budapest University of Technology and Economics, Budapest, Hungary.

As shown in Figure S1, the EDS line-scan analysis was conducted in the nanowire-free region of sample B1. According to the elemental distribution, the left region corresponds to Al, while the right region corresponds to  $\text{Ti}_2\text{SnC}$  particles. The line-scan results indicate that the Sn content in the  $\text{Ti}_2\text{SnC}$  region is extremely low and exhibits little variation, suggesting that Sn atoms have diffused out of the  $\text{Ti}_2\text{SnC}$  matrix during heat treatment. Meanwhile, Al signals are also detected within the  $\text{Ti}_2\text{SnC}$  region, indicating the diffusion of Al atoms into the  $\text{Ti}_2\text{SnC}$  structure. Based on the EDS data, the calculated atomic ratio of Al/Ti is approximately 7-9, which supports the possible formation of  $\text{TiAl}_3$ .

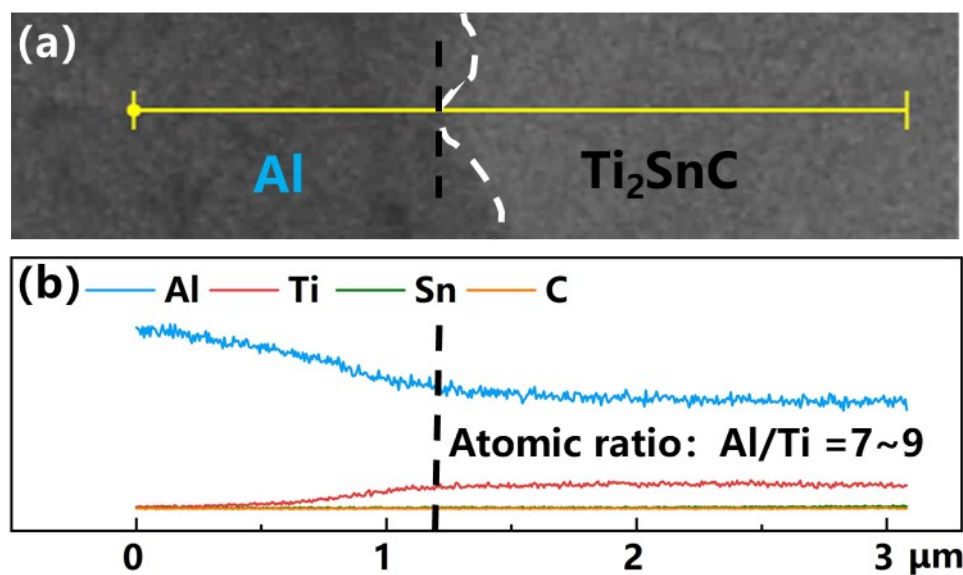

Figure S1 EDS line-scan results of the nanowire-free region in sample B1.(a) SEM image and the corresponding line-scan path; (b) Line-scan distributions of Al, Ti, Sn, and C elements. The nanowire -

free region was intentionally selected to minimize the influence of nanowires on the line-scan results.

As shown in Figure S2, the nanowires preferentially grow near the Al/Ti<sub>2</sub>SnC interfacial regions. The EDS mapping results indicate that Sn is mainly enriched around the nanowire roots, whereas the Sn signal inside the Ti<sub>2</sub>SnC region is significantly weakened, suggesting that Sn atoms diffuse out from the Ti<sub>2</sub>SnC lattice during heat treatment. Meanwhile, the Ti and C elemental distributions remain highly overlapped in the matrix region, indirectly indicating the formation of TiC after the decomposition of Ti<sub>2</sub>SnC.

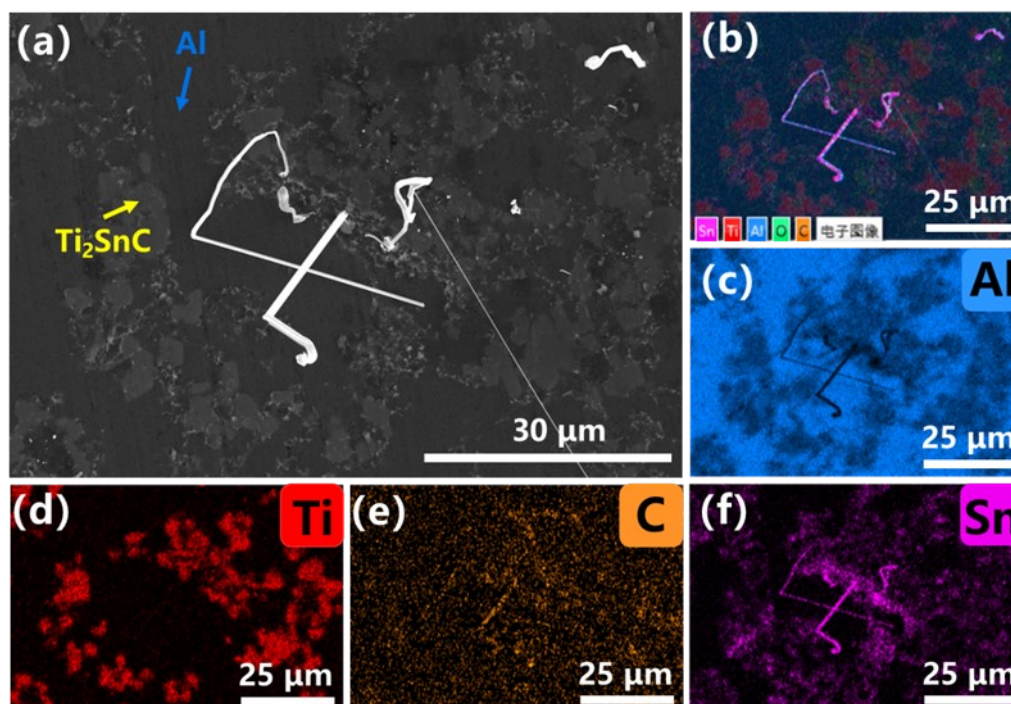

Figure S2 EDS elemental mapping results of the region with a small amount of nanowires growth in sample B1. (a) SEM image; (b) overall elemental mapping image; (c-f) corresponding EDS elemental mapping results of Al, Ti, C and Sn, respectively. The region with limited nanowire growth was intentionally selected to better reveal the elemental distribution in the matrix as well as at the nanowire roots.

To select appropriate conditions for releasing Sn from the Al/Ti<sub>2</sub>SnC matrix, a series of specimens was prepared following the same process while varying the heat-treatment temperature and dwell time. Sample identifiers are listed in Table S1.

Table S1. Samples Designation, Composition, and Processing Conditions

| Sample name | Metal: Ti <sub>2</sub> SnC (by mole) | Temperature/°C<br>Pressure/MPa | Temperature/°C<br>Time/h |
|-------------|--------------------------------------|--------------------------------|--------------------------|
| B4          | Al:Ti <sub>2</sub> SnC=1:0.1         | 210 °C/400 MPa                 | 500 °C/2 h               |
| B5          | Al:Ti <sub>2</sub> SnC=1:0.1         | 210 °C/400 MPa                 | 550 °C/2 h               |
| B6          | Al:Ti <sub>2</sub> SnC=1:0.1         | 210 °C/400 MPa                 | 600 °C/2 h               |
| B7          | Al:Ti <sub>2</sub> SnC=1:0.1         | 210 °C/400 MPa                 | 650 °C/2 h               |

Figure S1. XRD results show that after heat treatment at 550 °C for 2 hours, the phase constitution remained Al and Ti<sub>2</sub>SnC. When the temperature was increased to 600 °C, diffraction peaks of TiAl<sub>3</sub> and Sn appeared, while reflections from Al and Ti<sub>2</sub>SnC persisted, indicating that Sn release from Ti<sub>2</sub>SnC was incomplete at 600 °C. Upon raising the temperature to 650 °C, the main phases became Sn and TiAl<sub>3</sub>, with only minor Al and residual Ti<sub>2</sub>SnC. Since 650 °C is close to the melting point of Al, the temperature did not increase further. So, 650 °C was identified as the optimal heat-treatment temperature.

Figure S2 Surface morphologies of samples B4-B7. No nanowire growth was observed after heat treatment at 500 °C. After 550 °C, a few small mounds appeared on the surface of B5, implying that Ti<sub>2</sub>SnC began to release atomized Sn at this temperature, though the amount was limited. At 600 °C and 650 °C, thermal activation of Ti<sub>2</sub>SnC released large amounts of Sn, leading to the growth of abundant metal nanowires on the surface.

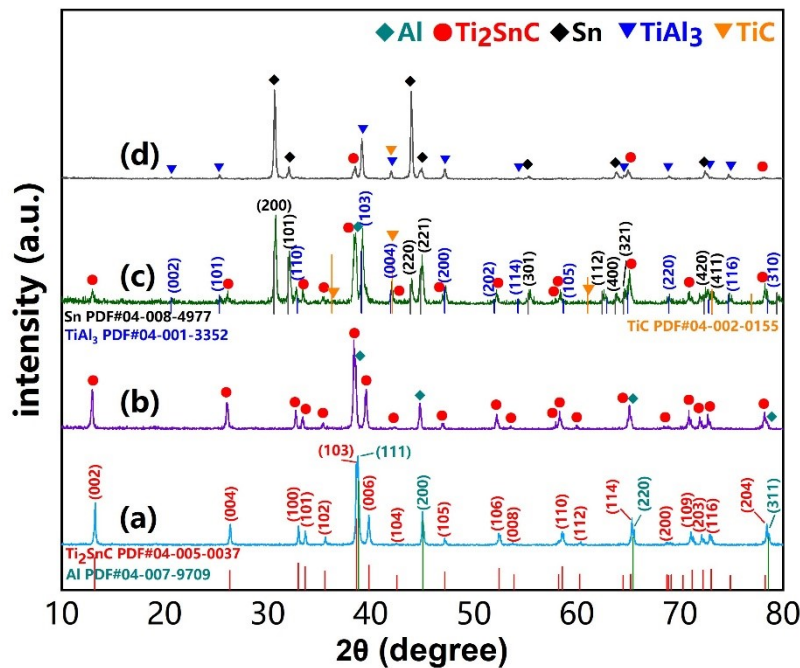

Figure S3. XRD patterns of bulk Al/Ti<sub>2</sub>SnC sample (Al: Ti<sub>2</sub>SnC = 1:0.1, molar) after 2 h heat treatment at different temperatures: (a) as-prepared, (b) 550 °C, (c) 600 °C, (d) 650 °C.

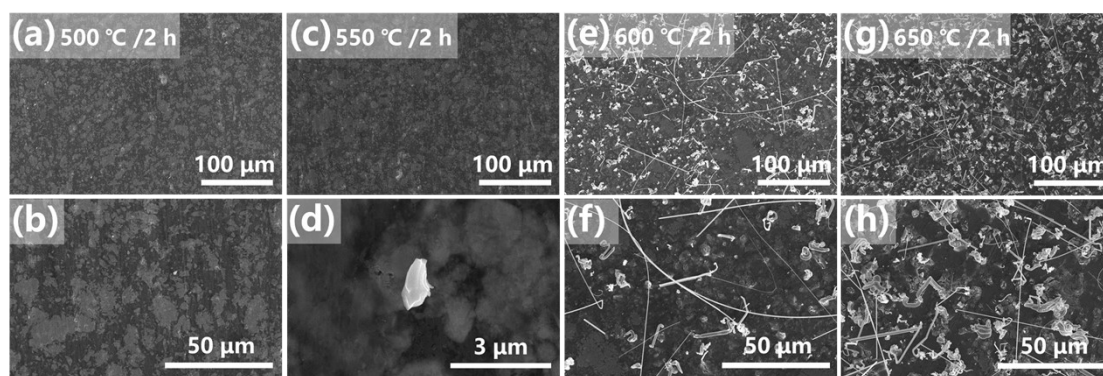

Figure S4. Surface nanowire growth on samples B4–B7. (a-b) B4-500 °C/2h, (c-d) B5-550 °C/2h, (e-f) B6-600 °C/2h, (g-h) B7-650 °C/2h.

As evidenced by the XRD (Figure S3) and SEM (Figure S4) results obtained at 650 °C, extending the dwell time from 0.5 h to 1 h and 2 h led to an increased number of surface nanowires and hillock-like features, suggesting more extensive outward diffusion of atomized Sn and more pronounced decomposition of  $\text{Ti}_2\text{SnC}$ . Considering that a sufficient nanowire population can already be achieved at 0.5 h. Therefore, the heat-treatment time was set to 0.5 h.

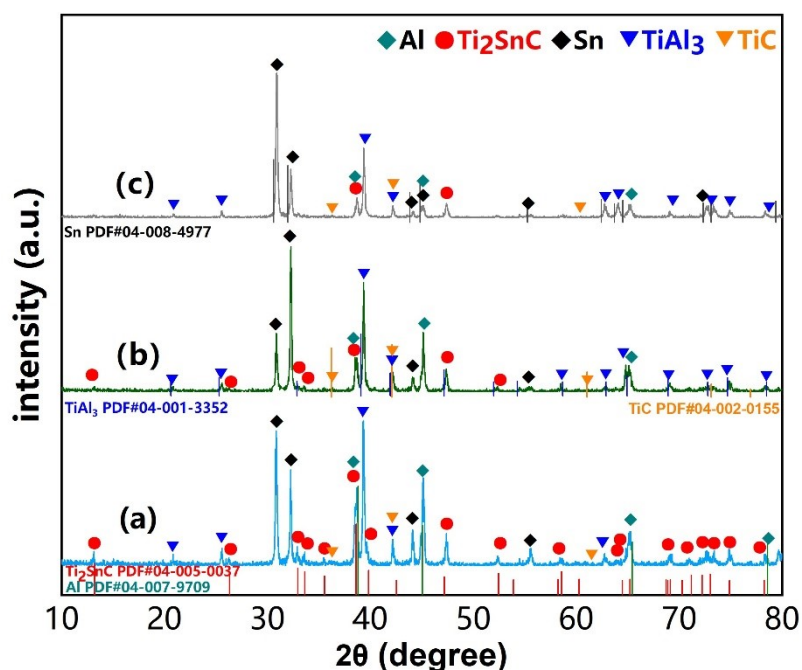

Figure S5 XRD patterns of bulk Al/ $\text{Ti}_2\text{SnC}$  sample (Al:  $\text{Ti}_2\text{SnC}$  = 1:0.1, molar) after heat treatment at 650 °C for different dwell times (a) 0.5 h, (b) 1 h, (c) 2 h.

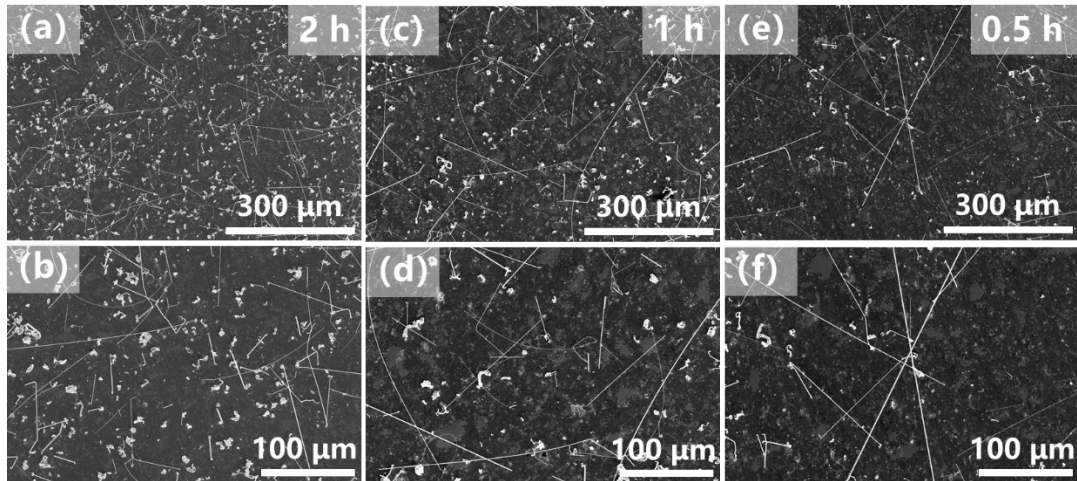

Figure S6 Surface nanowire growth on samples B7-B9, B1. (a-b) B7-650 °C/2 h, (c-d) B8-650 °C/1h, (e-f) B1-650 °C/0.5h.

To verify the scalability of this approach for producing large quantities of nanowires,  $\text{Ti}_2\text{InC}$  was synthesized following the reference[1] and uniformly mixed with Al at a molar ratio of 1:0.1. After heat pressing at 210 °C/400 MPa, the compacts were heat-treated at 650 °C for 2 hours. Numerous In nanowires were observed on the surface of the aluminum matrix (Figure S5).

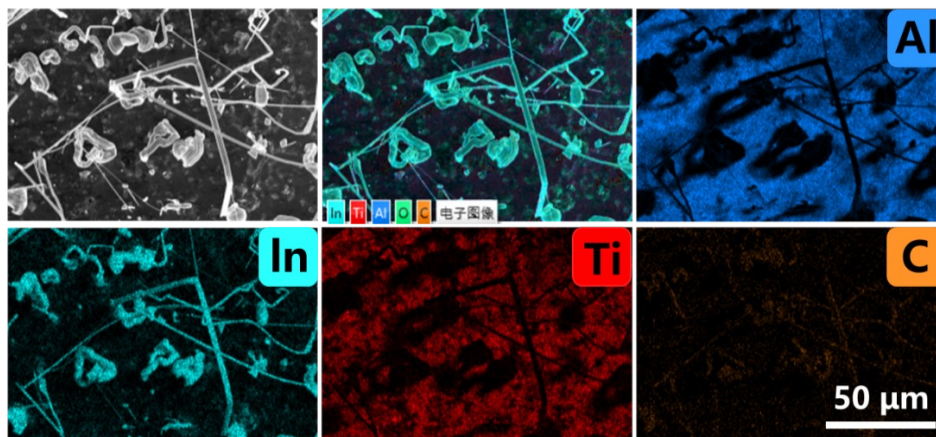

Figure S7. In nanowires grown on the surface of the Al/ $\text{Ti}_2\text{InC}$  sample.

In addition, Al,  $\text{Ti}_2\text{InC}$ , and  $\text{Ti}_2\text{SnC}$  were weighed at a molar ratio of 1:0.05:0.05, uniformly mixed, thermal-pressed at 210 °C/400 MPa, and heat-treated at 650 °C for 0.5 h; the surface of the aluminum matrix exhibited numerous InSn nanowires (Figure S6).

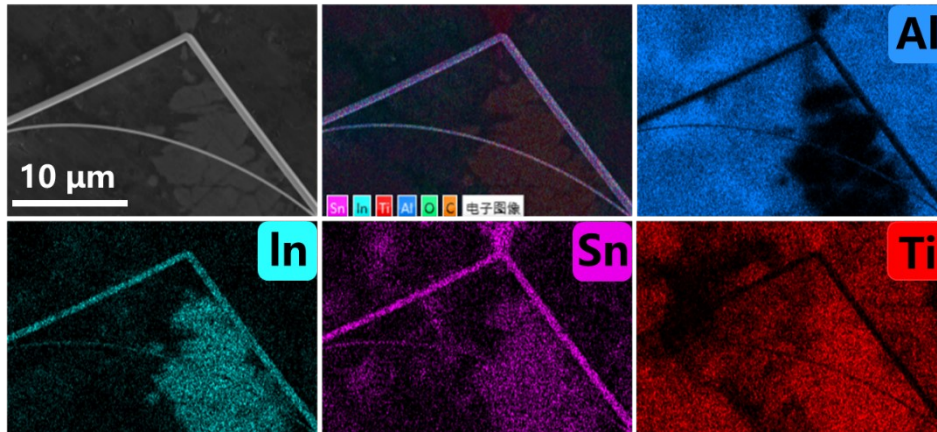

Figure S8. InSn nanowires grown on the surface of the Al/Ti<sub>2</sub>InC/ Ti<sub>2</sub>SnC sample.

### Reference

- [1] S. Li, Y. Liu, P. Zhang, Y. Zhang, C. Lu, L. Pan, J. Ding, Z. Sun, Interface energy-driven indium whisker growth on ceramic substrates, *Journal of Materials Science: Materials in Electronics*, 32 (2021) 16881-16888. <https://doi.org/10.1007/s10854-021-06250-5>.
